# BlobToolKit – Interactive quality assessment of genome assemblies

Richard Challis <sup>1,2\*</sup>, Edward Richards <sup>3</sup>, Jeena Rajan<sup>3</sup>, Guy Cochrane <sup>3</sup>,  
Mark Blaxter <sup>1,2</sup>

<sup>1</sup> Institute of Evolutionary Biology, University of Edinburgh, Edinburgh EH9 3JT, UK

<sup>2</sup> Wellcome Sanger Institute, Cambridge CB10 1SA, UK

<sup>3</sup> European Molecular Biology Laboratory, European Bioinformatics Institute,  
Wellcome Genome Campus, Cambridge CB10 1SD, UK

ORCIDs

Challis: 0000-0002-3502-1122

Richards: 0000-0001-5975-6003

Rajan: 0000-0002-3613-0013

Cochrane: 0000-0001-7954-7057

Blaxter: 0000-0003-2861-949X

\*Corresponding author: Richard Challis [rc28@sanger.ac.uk](mailto:rc28@sanger.ac.uk), Wellcome Sanger  
Institute, Cambridge CB10 1SA, UK

Running Title: Interactive assembly exploration

Keywords: Bioinformatics, visualisation web-tool, genome assembly, quality  
control

26

# Abstract

27 Reconstruction of target genomes from sequence data produced by instruments  
28 that are agnostic as to the species-of-origin may be confounded by contaminant  
29 DNA. Whether introduced during sample processing or through co-extraction  
30 alongside the target DNA, if insufficient care is taken during the assembly process,  
31 the final assembled genome may be a mixture of data from several species. Such  
32 assemblies can confound sequence-based biological inference and, when  
33 deposited in public databases, may be included in downstream analyses by users  
34 unaware of underlying problems.

35  
36 We present BlobToolKit, a software suite to aid researchers in identifying and  
37 isolating non-target data in draft and publicly available genome assemblies.  
38 BlobToolKit can be used to process assembly, read and analysis files for fully  
39 reproducible interactive exploration in the browser-based Viewer. BlobToolKit can  
40 be used during assembly to filter non-target DNA, helping researchers produce  
41 assemblies with high biological credibility.

42  
43 We have been running an automated BlobToolKit pipeline on eukaryotic  
44 assemblies publicly available in the International Nucleotide Sequence Data  
45 Collaboration and are making the results available through a public instance of  
46 the Viewer at <https://blobtoolkit.genomehubs.org/view>. We aim to complete  
47 analysis of all publicly available genomes and then maintain currency with the  
48 flow of new genomes. We have worked to embed these views into the  
49 presentation of genome assemblies at the European Nucleotide Archive,  
50 providing an indication of assembly quality alongside the public record with links  
51 out to allow full exploration in the Viewer.

52

53

54

# Introduction

55 Genome sequences are part of the basic data economy of modern bioscience.  
 56 Using assembled genomes, it is possible to identify loci underpinning key traits of  
 57 interest, discover the regulatory logic of gene expression, investigate disease  
 58 processes, and explore the evolutionary histories of genes and species. These  
 59 research programmes rely implicitly on the correctness of the genome  
 60 sequences. Errors in genome sequences risk distracting or even derailing their  
 61 effective use.

62 Assembly of true genome sequences from reads shorter than the length of a  
 63 replicon remains a difficult task (Ekblom and Wolf 2014). This task is made more  
 64 complex when isolation of the original samples or the processing of DNA to  
 65 generate the raw sequence data cannot avoid contamination of the target  
 66 genome with DNA from non-target sources (Salter et al. 2014; Salzberg et al.  
 67 2005). Sequencing instruments are agnostic as to species-of-origin of the  
 68 fragments they are tasked with processing, and thus a contaminated sample will  
 69 result in a contaminated raw dataset. If insufficient care is taken during the  
 70 assembly process, this can mean that the final assembled genome is a mixture of  
 71 data from several species, and cannot be used as a good representation of the  
 72 target species (Merchant, Wood, and Salzberg 2014). Downstream, this can result  
 73 in erroneous attribution of biochemical or genetic properties to the target species  
 74 that are actually derived from the contaminants' genomes (Artamonova et al.  
 75 2015; Arakawa 2016).

76 However, not all "contaminants" are uninteresting. Many eukaryotic species live in  
 77 close biological association with symbionts, and many bacteria exist in, and can  
 78 only be grown as, consortia of interacting species (López-García, Eme, and  
 79 Moreira 2017). In these systems genome sequencing aims to reconstruct the  
 80 genomes of all the independent species and strains involved (Kumar and Blaxter  
 81 2011).

82 We are developing BlobToolKit, a software suite that will aid researchers in  
 83 identifying contamination before it is erroneously blessed as being part of a target  
 84 genome and to separate sequences that belong to different members of  
 85 biological consortia. BlobToolKit is based on BlobTools written by Dominik Laetsch  
 86 (Laetsch and Blaxter 2017) which was in turn based on the original Blobology  
 87 pipeline from Sujai Kumar (Kumar et al. 2013). We present a toolkit that has been  
 88 rewritten in its entirety to make use of advanced web frameworks and  
 89 visualisation. Like its progenitors, BlobToolKit uses GC proportion and coverage as  
 90 two major axes on which contigs or scaffolds from an assembly can be displayed.

91 GC proportion is consistent within most genomes, with a distribution around a  
 92 mean value. Genomes can have regions of differing composition yielding bi- (or

multi-) modal distributions. Genomes from different taxa present in a mixed sample frequently have different GC proportion, permitting a primary separation on this axis. The read coverage of each contig or scaffold in an assembly is an estimate of the relative stoichiometry of the replicon from which it derives. All the contigs or scaffolds from one species should have the same coverage, barring the presence of organelles (usually high coverage relative to the nuclear genome), sex chromosomes (50% coverage in the heterogametic sex) and uncollapsed haploid segments (again 50% coverage). Contaminant or cobiont genomes will have different, internally consistent stoichiometry and thus can be distinguished on this axis.

To provide initial identification of sets of contigs or scaffolds from distinct taxa, BlobToolKit also decorates each scaffold or contig with a taxonomic attribution based on similarity to sequences in reference databases, as assessed by BLAST (Altschul 1997) or Diamond (Buchfink, Xie, and Huson 2015). This taxonomic attribution is tentative due to the presence of mis-annotated records in the public databases. In conjunction with GC proportion and coverage measures this serves to highlight clusters (or blobs) of contigs that share distinct properties and coherent taxonomic source.

This richly marked-up annotation of the assembly makes it possible to assess whether it derives from single or multiple source organisms. The BlobToolKit data can be used to separate contigs and scaffolds (and the reads that generated them) into separate bins for subsequent reanalyses. BlobToolKit can be used as part of the process of genome assembly, playing a role both in separating raw input data for assembly of distinct components and in quality assurance of the final product. For genome assemblies released publicly, BlobToolKit can be used to provide quality assurance and to identify issues that should be taken into consideration in downstream reuse of the data.

Here we present the latest version of BlobToolKit, show how it can be used to probe the integrity of genome assemblies, describe the visualisations available and present snapshots of our ongoing BlobToolKit analyses of all eukaryotic genome assemblies available in the European Nucleotide Archive (ENA) (Amid et al. 2019).

# BlobToolKit

All BlobToolKit code is freely available under open source licenses from <https://github.com/blobtoolkit>. Distinct components are placed in four repositories: **BlobTools2** (command line tools to create and filter datasets), **Specification** (a formal specification and validator for the JSON-based data format), **Viewer** (interactive dataset visualisation), and **INSDC-pipeline** (a Snakemake pipeline to run the BlobToolKit workflow on publicly available datasets).

## BlobTools2

**BlobTools2** is a command line program to import a genome assembly together with BLAST, Diamond, read mapping and BUSCO analysis output files to generate a dataset that can be filtered using the command line and/or explored interactively in a web browser using the BlobToolKit **Viewer**.

### *BlobDir* format

**BlobTools2** is a re-implementation of BlobTools (Laetsch and Blaxter 2017), written in python3 and based around a *BlobDir* directory of JSON format files. This data structure has been chosen as it can be easily validated using JSON-schema and is highly extensible. Separate JSON files contain distinct attributes of the assembly, with one entry per contig or scaffold. The attributes include GC proportion, length, coverage from a single sequencing library, taxonomic inference based on BLAST hits. Because the attributes are treated as generic datatypes (identifiers, variables, categories, arrays of categories or variables and arrays of arrays), it is possible to incorporate results from new analyses without making significant changes to the codebase. Field metadata are collated in a single JSON file allowing basic dataset information to be accessed without loading the full set of values. JSON is the native format for the JavaScript-based BlobToolKit **Viewer** and the typical patterns of use require computation across all data for a given attribute at once. Because the **Viewer** architecture inverts the usual server-client model, pushing computation to the client, this *BlobDir* format was favoured for efficiency of data access over alternatives such as SQLite or HDF5.

### Adding data to a *BlobDir*

#### Assembly

The minimum input required to create a new *BlobDir* dataset is a FASTA format assembly sequence file. This is parsed to generate a list of sequence identifiers, along with a set of basic, per-sequence statistics (length, GC proportion and

undefined [N] bases). Additional metadata, including assembly accessions and taxonomic information can be provided for inclusion in the dataset metadata and, if an NCBI taxonomy ID (taxid) is provided, expanded taxonomic lineage details will be included. The *BlobDir* can be modified, for example, to add attributes based on new analyses, using the **BlobTools2** *add* command.

## Coverage

Both base and read coverage are calculated for each contig by parsing read alignment files in BAM, SAM or CRAM formats using the pysam library (<https://github.com/pysam-developers/pysam>).

## Taxonomy

Taxonomy information is assigned to contigs and scaffolds through parsing of similarity searches of taxonomically-annotated sequence databases. Rather than simply use a single, top-scoring hit for each contig or scaffold, **BlobTools2** uses simple taxonomy rules (taxrules) to deliver a best-supported assignment. **BlobTools2** deploys taxrules introduced in BlobTools to assign putative taxonomic associations to sequence contigs: *bestsum* (total bitscore of all hits across all databases) and *bestsumorder* (total bitscore from a single database search, with scores taken from successive databases for contigs or scaffolds that failed to identify hits in the first). In a typical use case a file of NCBI BLAST+ *blastn* hits to the NCBI nt nucleotide database and a file of Diamond *blastx* hits to the UniProt/SwissProt database are supplied to be processed under one of these taxrules to generate a set of JSON files. For each of eight taxonomic ranks from superkingdom to species, files are generated containing the most likely taxon name, the summed bitscore of all hits to that taxon, a c-index value indicating the number of alternate taxa at that rank, and taxon names for every hit to each contig or scaffold. An additional file shows the location, score and taxid for every hit, information that is independent of the taxonomic rank under consideration. Results are split across multiple files to allow faster access to individual components during subsequent analyses.

## BUSCO

As an example of the incorporation of new analyses, BUSCO (Benchmarking Universal Single-Copy Orthologues), a widely used tool for quality assessment of genome assemblies (Waterhouse et al. 2017) generates a sparse annotation where a few contigs are decorated with the presence of a BUSCO reference gene. **BlobTools2** incorporates BUSCO using the same basic datatype as BLAST hit distributions. The only unique code occurs in a specially written parser module for the BUSCO file format.

## Hyperlinks

Hyperlink templates can also be added to the *BlobDir* metadata to allow hyperlinks from assembly/taxon identifiers, individual sequence identifiers or individual BLAST/Diamond hits to external resources.

## Applying filters

**BlobTools2** supports filtering of assembly files, read files and of *BlobDir* datasets based on values of any of the constituent attributes. Variable attributes support filtering based on maximum and/or minimum values, category attributes may be filtered by presence or absence of one or more keys and individual records can be filtered with lists of identifiers to keep or exclude. Filtering of input files can assist in the process of iterative assembly improvement, while filtering of datasets may allow more detailed interrogation of subsets of the data in the BlobToolKit viewer without the need to repeat analyses or filter analysis outputs for re-importing.

## Specification

The BlobToolKit **Specification** describes the file formats required by **BlobTools2** and the BlobToolKit **Viewer** and includes a validator that tests a *BlobDir* dataset for departures from the specification. Use of JSON format allows validation with JSON-schema. While basic validation is possible with a static schema, the validator generates and tests against dynamically generated schemas to allow for the dependence of some metadata values on the presence and content of data in field-specific files. Validation includes type checking, testing for presence and content of expected files and assessing metadata ranges against the values present in corresponding field files.

## BlobToolKit Viewer

The BlobToolKit **Viewer** allows interactive exploration of *BlobDir* datasets produced by **BlobTools2**.

## Application programming interface

All data in a *BlobDir* can be made available through an application programming interface (API) implemented using the Express Node.js web framework (<https://expressjs.com/>). The API provides search functionality against entries in the *assembly* and *taxon* sections of the metadata along with direct access to datasets, fields and individual records within fields. Full API documentation is available at <https://blobtoolkit.genomehubs.org/api-docs/>.



## Interactive data exploration

The BlobToolKit **Viewer** presents data retrieved via the API in a set of interactive views for dataset visualisation, exploration and filtering. The **Viewer** is built on the React (<https://reactjs.org>) JavaScript library. It makes extensive use of Redux and reselect frameworks to allow real-time interaction with genome-scale datasets in client web browsers. This makes it practical to host large numbers of publicly accessible datasets on a server with a relatively small footprint. For datasets that are too large to be processed on the fly (including those with millions of contigs), pre-generated static image files can be served in place of the interactive views. Interactive plots are powered by the d3 data visualisation library (<https://d3js.org>) and all plots can be exported directly as PNG or SVG image files.

### Filters view

The **Viewer** supports the same set of filter parameters as **BlobTools2**. Filter controls provide a graphic representation of category or variable distributions. To reduce network overheads, only data for active fields are loaded into the browser and the filter view provides an indication of which data are currently available. All views update instantly based on changes to filters.

### Blob view

Blobology and BlobTools introduced the blob plot with contigs represented as circles, with areas proportional to contig length. This representation has several computational and interpretation issues. Circles are computationally expensive to plot, and rendering of datasets with many contigs (some published assemblies have over 1 million) makes it impossible to see all the data. While the scaled circle view is available in the **Viewer**, the default is to bin data into squares or hexagons of GC proportion-coverage space. In addition to resolving the problems with circles identified above, binning makes it possible to interactively select contigs within a chosen GC proportion-coverage bin. A square-binned blob plot of GC proportion vs. coverage is the default view when opening a new dataset with the **Viewer**. The squares are scaled to the square-root of the sum of lengths of contigs within each bin and coloured by best-matching phylum.

If used with a single scaling function and parameter set, binning has disadvantages, especially where the reduced prominence of minor sets of contigs can make it harder to identify cobionts. To overcome this, several scaling parameters can be modified, and viewing the plot while changing these parameters can be a useful way to explore features that are not immediately clear in a static image. The resolution of the plot can be adjusted, making the bins larger to facilitate the selection of major features or smaller to highlight fine-scale patterns, such as the off-axis bimodality associated with heterozygosity. The default square-root scaling can be adjusted to log or linear scales to increase or reduce the prominence of smaller values. The reducer function used to convert



273 the values for each contig into a single value can also be adjusted from the  
 274 default (sum) to show the minimum, maximum, mean or count of values in each  
 275 bin.

276 All of these options are available for plots of any variable in the dataset against  
 277 any other variable, for example, to allow coverage vs. coverage plots to identify  
 278 contigs that are only supported by one sequencing library. Categories may be  
 279 assigned based on any of the taxonomic ranks that have been calculated.

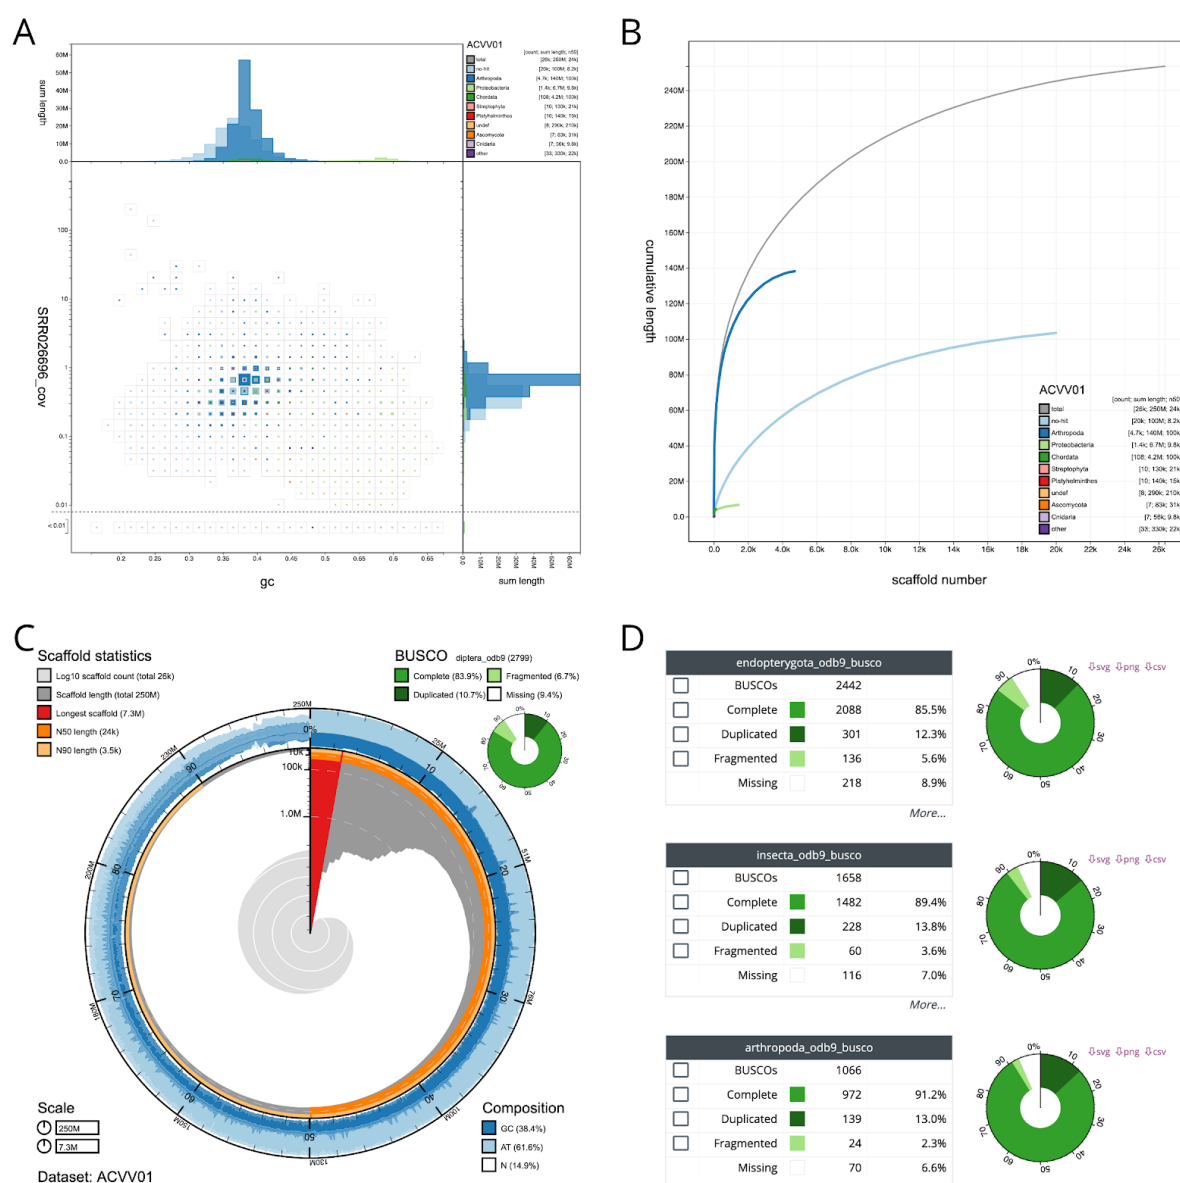

**Figure 1. Assembly views available in the BlobToolKit Viewer, illustrated using the *Drosophila albomicans* assembly ACVV01** (Zhou et al. 2012).

(A) Square-binned blob plot showing the distribution of assembly scaffolds on GC proportion and coverage axes. Squares within each bin are coloured according to taxonomic annotation and scaled according to total span. Scaffolds within each bin can be selected for further investigation. (B) Cumulative assembly span plot showing curves for subsets of scaffolds assigned to each phylum relative to the overall assembly. (C) Snail plot (Challis et al., 2016) summary of assembly statistics. (D) BUSCO scores allow selection of all scaffolds with a BUSCO reference gene in each category. These images derive from analyses of the whole assembly. Each view updates automatically in response to any filters or selections that are applied to the dataset. This figure can be regenerated, and explored further, using the URLs given in File S1.



## Cumulative view

The Cumulative view is a commonly used representation of the fraction of the genome that is represented as size-ordered contigs are added to the assembly. These plots also show this cumulative distribution broken down according to taxonomic assignments (the default is by phylum) and allow these separate curves to be stacked to show cumulative span by taxon.

## BUSCO view

If BUSCO scores are added to a dataset, the BUSCO view shows a summary of the counts in each BUSCO category (complete, fragmented, etc.) under the current set of filters. It also allows selection of all contigs within a BUSCO category so that their distribution can be seen in the Blob view or the contigs can be inspected in the Table view. These interactions with other views make it possible to assess the impact of possible cobionts on the overall BUSCO score for an assembly.

## Snail view

The Snail view is a reimplement of interactive assembly statistic plots introduced in the Lepbase project (Challis et al. 2016). These capture a rich variety of assembly properties in a single dynamic graphic. Snail plots can highlight specific features of an assembly that may not be immediately apparent from tabulated data.

## Table view

The Table view shows information for each contig for each currently active attribute. The available columns can be controlled by activating or deactivating individual attributes in the Filters view. The default columns show the GC proportion, length, coverage and taxonomic assignment that are used to generate plots in the Blob and Cumulative views. Individual records can be selected (either to view their position in the Blob view or for use in filtering) and rows can be sorted according to selected status or by any of the attribute values.

## Hit view

The Hit view shows the distribution of sequence similarity hits to sequence databases along a single contig and can be accessed from the Table view of contigs, and is particularly useful for investigating contigs or scaffolds with unexpected or conflicting taxonomic attribution. The hyperlink functionality can be used to embed links to associated records in public sequence databases.

## Detail view

A subset of dataset metadata is presented in a tabular Detail view, together with optional links to external resources. Full dataset metadata can be retrieved in JSON format.

## Reproducible analyses

Sharing analyses reproducibly is critical, particularly when many choices have been made to generate a particular filtered dataset or image. To aid in reproducibility the **Viewer** encodes query parameters within the URL for the displayed data. Parameters developed during interactive filtering can be applied in **BlobTools2** (specified individually or using the entire URL or query string) to filter input files and *BlobDir* datasets. Selection-based filters are not stored in the URL due to the potential number of identifiers involved. Selections can be exported and imported *via* a List menu, which will export a JSON format file that includes a complete list of identifiers based on the current filters, including selections. This file also contains a summary of URL parameters and filtered dataset statistics (including BUSCO scores, span and N50 by taxon, etc.) and can be used to specify filter parameters used within **BlobTools2**.

## Access to views

**BlobTools2** provides a *view* command that uses the Selenium WebDriver to provide non-interactive access to all plot types. For datasets with millions of contigs that are too large for practical interactive exploration, use of *view* provides a way to generate static images that will not display in the interactive mode.

## INSDC-pipeline

**INSDC-pipeline** is a reusable Snakemake (Köster and Rahmann 2018) pipeline to run analyses on publicly available, International Nucleotide Sequence Database Collaboration (INSDC; <http://www.insdc.org/>) public eukaryotic genome assemblies. We built the pipeline to automate the generation of *BlobDir* datasets from the available data, including retrieval and formatting of database files, retrieval of sequences for each assembly and the associated raw read files, read mapping, BLAST and Diamond searches, and BUSCO analyses (Figure 2). We have made the results available on a public instance of the BlobToolKit **Viewer** at <https://blobtoolkit.genomehubs.org/view> (Table 1).

This workflow broadly follows the BlobTools workflow (Laetsch and Blaxter 2017), but with some changes to increase efficiency. For example, Diamond searches against UniProt are only run for contigs with no BLAST hit to the nt database, and the addition of BUSCO analyses. Query genomes are masked using *windowmasker* to reduce spurious matches to interspersed repeats. A wrapper script for *blastn* splits contigs longer than 100 kb into chunks before running BLAST, to avoid taxonomic inference for longer contigs being dependent on a

single region. Since this pipeline was run on public datasets extracted from the same databases that are used to infer taxonomic affiliation, all sequences belonging to the same genus as the query assembly were excluded either before (Diamond) or during (BLAST) sequence similarity searches.

The pipeline uses Conda (<https://docs.conda.io/projects/conda/en/latest/index.html>) environments to load all external dependencies. These are stored as YAML-format files within the **INSDC-pipeline** repository. The *generate\_metadata* step of the pipeline includes the current git commit hash in an extended version of the input configuration file so the specific versions of each program used can be determined from the *BlobDir* metadata. A record of database versions is maintained by including the date of creation in the local database directory names.



380

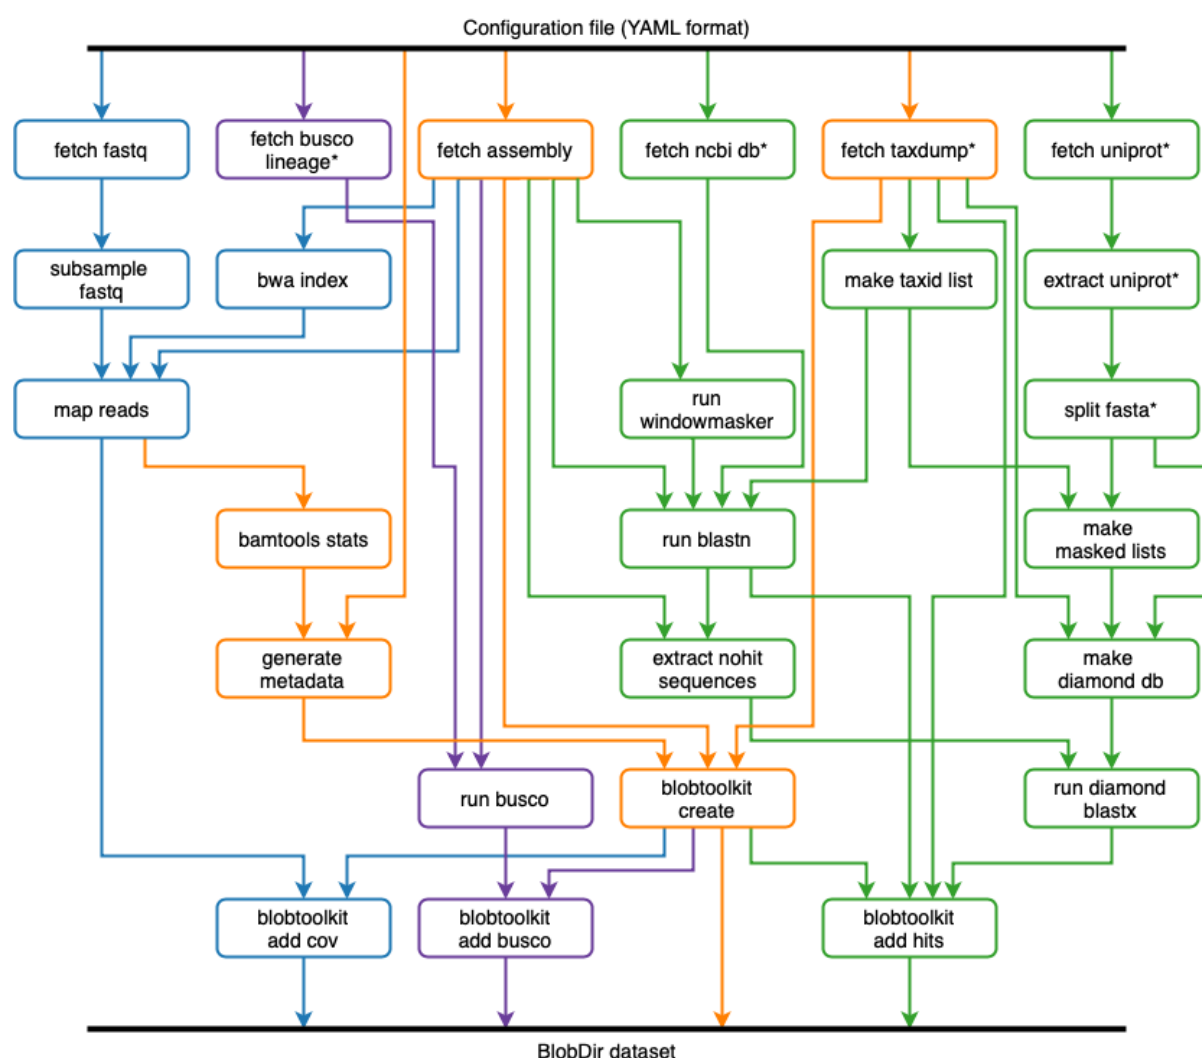

381 **Figure 2. Depiction of the snakemake workflow used to analyse publicly**  
 382 **available (INSDC-registered) eukaryotic genome assemblies.**

383 The workflow is run once for each assembly. Each box represents a Snakemake  
 384 rule that may be run one or more times during workflow execution. The workflow  
 385 can be logically divided into four parts: (i) creation of a minimal *BlobDir* dataset  
 386 based on a single assembly with metadata derived from the configuration file and  
 387 additional taxonomic annotation from the NCBI taxdump, shown in orange; (ii)  
 388 addition of sequence-similarity search results based on *blastn* and Diamond  
 389 *blastp* searches of the nt and refseq databases, shown in green; (iii) addition of  
 390 read coverage data based on minimap2 alignment of read files linked to the  
 391 assembly record (where available), shown in blue; and (iv) addition of BUSCO  
 392 results based on analyses with all relevant BUSCO lineages, shown in purple.  
 393 Rules marked with an asterisk are typically only run the first time the pipeline is  
 394 executed as they generate local copies of relevant database files used elsewhere  
 395 in the pipeline.

396

**Table 1. Summary of assemblies analysed and available\* at <https://blobtoolkit.genomehubs.org/view> on 13th November 2019.**

| <i>Kingdom</i>         | <i>Species</i>   | <i>Assemblies</i> |                   |                      |
|------------------------|------------------|-------------------|-------------------|----------------------|
|                        |                  | <i>Total</i>      | <i>With reads</i> | <i>Without reads</i> |
| <b>Fungi</b>           | 830/2016         | 1689/4992         | 1211/2787         | 478/2205             |
| <b>Metazoa</b>         | 570/1437         | 743/2160          | 376/1311          | 367/849              |
| <b>Viridiplantae</b>   | 180/545          | 232/839           | 121/439           | 111/400              |
| <b>Other Eukaryota</b> | 275/353          | 516/768           | 204/398           | 312/370              |
| <b>Total</b>           | <b>1855/4351</b> | <b>3180/8759</b>  | <b>1912/4935</b>  | <b>1268/3824</b>     |

\*For each kingdom within Eukaryota, the numbers of assemblies analysed/available are shown. Values were obtained through using a scripted query of the ENA and BlobToolKit APIs described in File S1.

## ENA Integration

We have worked to integrate the analyses generated by BlobToolKit with the genome presentations of the European Nucleotide Archive (ENA) (Amid et al. 2019), to enhance understanding and utility of submitted data. Importantly, ENA holds both deposited raw sequence read and genome assembly data and it is possible to mine these data to discover relationships describing which read sets were used in given assemblies. At the time of analysis, of the 7,632 eukaryotic genome assemblies present within the ENA that could be associated with read sets, 585 (8%) were associated with a single run in the raw sequence data, 875 (11%) with between two to four runs, and 6,172 (81%) associated with four or more runs. None of the eukaryotic genome assemblies explicitly referenced the run(s) used to create the assembly within the relevant metadata. Values differ from those presented in Table 1, which uses only data available through the API to make associations between genome assemblies and read sets. We note that the 585 assemblies associated with a single run derived from 266 unique species, potentially permitting the identification of common contaminants in frequently-reassembled taxa. The species with the most independent assemblies were *Saccharomyces cerevisiae*, *Homo sapiens* and *Pyricularia oryzae*. These findings led to the inclusion of user documentation for the process of referencing reads during eukaryotic genome assembly submission to the ENA (<https://ena-docs.readthedocs.io/en/latest/submit/assembly/genome.html#submitting-isolate-genome-assemblies>). This will encourage future assemblies to be submitted with a referenced run, thereby increasing the number of assemblies for which BlobToolKit can report contamination.

A cross-reference service was set up in conjunction with in-house cloud services for the purpose of processing eukaryotic genome assemblies hosted on the ENA via BlobToolKit, as well as hosting the resulting visual and textual data. The BlobToolKit API was used to access relevant data for each assembly in coordination with Jupyter Notebooks, generating hypertext markup language (HTML) documents for assemblies with links out to associated interactive BlobToolKit Viewer analyses. Each of these documents displays the respective blob, snail and cumulative length of scaffold by phylum plots, along with assembly statistics directly from the ENA website (see, for example, [https://www.ebi.ac.uk/ena/browser/view/GCA\\_000298335](https://www.ebi.ac.uk/ena/browser/view/GCA_000298335)). The generation of these documents is modified autonomously based upon the data available via the API, and uploaded to GitHub Pages respectively.

440

# Case Studies

441 The following case studies highlight some of the features of BlobToolKit and the  
442 ways it may be used in assessment of published assemblies.

443

## Identification of common cobionts

444 The *Drosophila albomicans* assembly ACVV01 (GCA\_000298335.1) contains 1,440  
445 scaffolds that have greatest sequence similarity to Proteobacteria sequences in  
446 the reference databases (nt and UniProt). On a blob plot of GC proportion vs.  
447 coverage, many of these scaffolds are found in a distinct blob with higher GC  
448 proportion and lower coverage than the majority of the assembled scaffolds  
449 (Figure 3A and B). The difference in the distributions of the two sets is highlighted  
450 in a kite representation of the data (Figure 3B).

451 When analysed at higher taxonomic resolution, the scaffolds assigned to  
452 Proteobacteria derive from several distinct species. The majority of  
453 proteobacterial scaffolds (representing 4.3 Mb of 6.7 Mb) are assigned to  
454 *Acetobacter*, and there are 1.8 Mb of scaffolds assigned to *Gluconobacter* (Figure  
455 3C). The *Gluconobacter* scaffolds have a lower coverage than the *Acetobacter*  
456 scaffolds, and thus the assembly is, as expected, less complete. *Acetobacter* and  
457 *Gluconobacter* species are common cobionts of *Drosophila* (Crotti et al. 2010) and  
458 usually have genomes of 3-4 Mb. A third group of scaffolds is assigned to the  
459 alphaproteobacterial genus *Wolbachia* (Figure 3D). *Wolbachia* are intracellular  
460 symbionts that commonly manipulate the reproductive biology of their hosts  
461 (Werren, Baldo, and Clark 2008), and insect-infecting strains have genomes of ~1.4  
462 Mb. However, the cumulative span of scaffolds assigned to *Wolbachia* is only 190  
463 kb. The GC proportion and coverage of these scaffolds is more congruent with  
464 that of the bulk, *Drosophila*-assigned scaffolds. Collectively, these data suggest  
465 that the *Wolbachia*-assigned scaffolds are likely to represent nuclear insertions of  
466 *Wolbachia* fragments. Such insertions are common in insect genomes, and derive  
467 from previous colonisation of the species by this endosymbiont (Dunning-Hotopp  
468 et al. 2007).

469 It is notable that some of the loci identified using the diptera\_odb9 BUSCO set  
470 (EOG091502LX, EOG091505EO, EOG091502SD, EOG091504TW, EOG09150B43,  
471 EOG09150529) are annotated as being present in scaffolds that have been  
472 assigned to Proteobacteria. Five of these scaffolds have GC proportions and  
473 coverages consistent with their being part of the bacterial rather than the  
474 *Drosophila* genomes. Thus the BUSCO assessment of ACVV01 is compromised by  
475 the presence in the bacteria of loci which are recognised as being members of  
476 the BUSCO dipteran reference gene set. While excluding the BUSCOs identified in  
477 the proteobacterial genomes makes a very small difference to the overall BUSCO  
478 completeness score of assembly ACVV01 (83.7% vs 83.9% complete;

diptera\_odb9; BUSCO 3.0.2), their inclusion in, for example, phylogenomic analyses would lead to erroneous inferences. Similar patterns are observed in other *Drosophila* assemblies. For example, in *Drosophila elegans* assembly AFFF02, two diptera\_odb9 BUSCOs (EOG0915021D, EOG091501A1) are present on scaffolds assigned to Proteobacteria. The mis-annotated BUSCOs from proteobacterial scaffolds in ACVV01 are found within core Arthropoda scaffolds in AFFF02 and *vice versa*. This highlights the importance of determining assembly integrity and contamination before assessing quality and completeness, and before proceeding to downstream analyses.

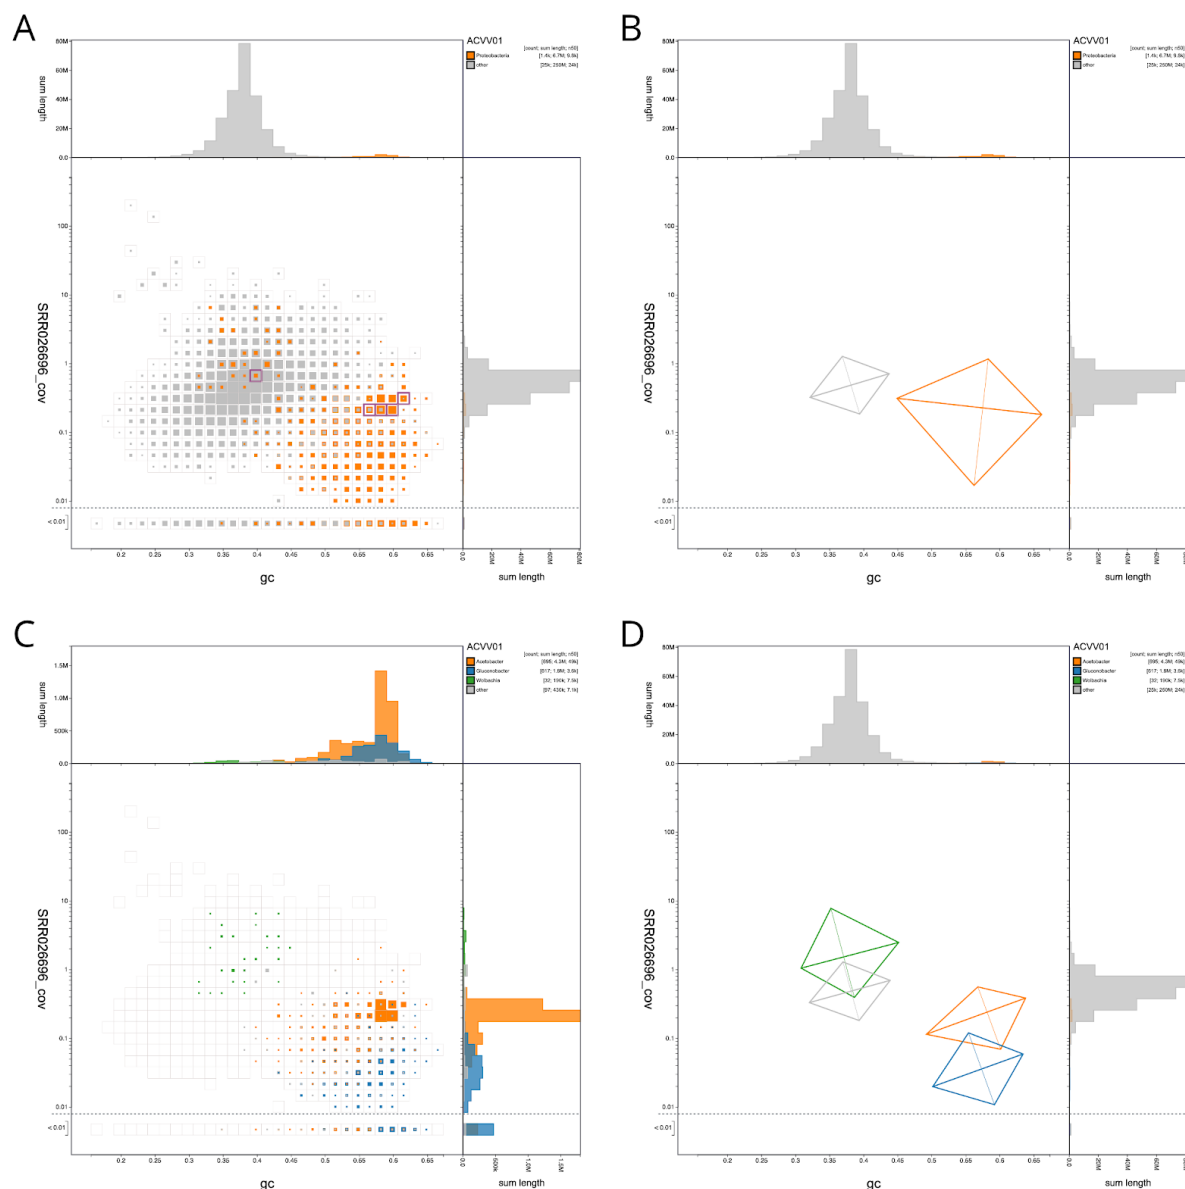

**Figure 3. Blobplot of base coverage in read set SRR026696 against GC proportion for scaffolds in *Drosophila albomicans* assembly ACVV01.**

(A & B) Scaffolds are coloured by phylum with Proteobacteria highlighted in orange and all other phyla grouped together in grey. Histograms show the distribution of scaffold length sum along each axis. (A) Square-binned blob plot at a resolution of 30 divisions on each axis. Coloured squares within each bin are sized in proportion to the sum of individual scaffold lengths on a logarithmic scale, ranging from 867 to 40,536,114. The bins highlighted in pink contain a total of 5 scaffolds that have been annotated as Proteobacteria but that contain BUSCOs using the diptera\_odb9 BUSCO set. The list of selected scaffolds is included in File S2. (B) A simplified representation of the distributions of scaffolds assigned to each phylum highlights the difference in GC proportion and coverage of Proteobacteria scaffolds. Each kite has a pair of lines representing two standard



deviations about the mean on each axis (weighted to account for scaffold lengths) that intersect at a point representing the weighted median. They are angled according to a weighted linear regression equation to indicate the relationship between coverage and GC proportion. **(C)** Assembly filtered to exclude non-proteobacterial scaffolds. Scaffolds are coloured by genus with *Acetobacter* highlighted in orange, *Gluconobacter* shown in blue and *Wolbachia* shown in green. Coloured squares within each bin are sized in proportion to the sum of individual scaffold lengths on a square-root scale, ranging from 1,005 to 771,195. **(D)** A simplified representation of the distributions of scaffolds assigned to each genus highlights the difference in GC proportion and coverage of *Acetobacter*, *Gluconobacter* and *Wolbachia* scaffolds. This figure can be regenerated, and explored further, using the URLs given in File S1.

## Visualisation of highly fragmented assemblies

*Conus consors* is a cone snail studied for its production of neurotoxins (Andreson et al. 2019). The *C. consors* assembly SDAX01 (GCA\_004193615.1; see <https://www.ncbi.nlm.nih.gov/genome/24193>) highlights the challenges associated with visualisation of highly fragmented datasets. The 2 Gb assembly is split into 2,688,687 scaffolds with an N50 length of 1,128 bp. While the full dataset can be viewed in the BlobToolKit **Viewer**, interactive visualisation of so many contigs requires use of a device with a relatively high-specification (at least 8 GB RAM) and a browser that does not limit the amount of available RAM (e.g. Firefox). To allow such assemblies to be viewed on any device, we have set default parameters to limit the computation required.

The default, binned view (Figure 4A) ensures that the number of graphic elements that must be rendered by the browser does not increase linearly with dataset size as would be the case if each scaffold were plotted individually. This representation is sufficient to show that SDAX01 has a unimodal distribution on both the GC proportion and coverage axes. However 550,837 scaffolds with a total span of over 170 Mbp have coverage below 0.01 with the selected read set (SRR1714990). An assembly of this size is typically based on a number of sequencing runs and in this case nine short read accessions are associated with the same bioproject (PRJNA267645) as the assembly. The largest three of these read sets were mapped to the assembly, allowing comparison of coverage across libraries. For scaffolds with coverage  $\leq 0.01$  in SRR1714990, a coverage vs. coverage plot of the remaining two libraries (SRR1719763 and SRR1712902; Figure 4B) shows the majority of these scaffolds (433,970 scaffolds with a total span of over 136 Mb) have coverage in at least one other library. Some have no coverage in any of the three libraries. It might be prudent to consider all these contigs as questionable components of the *C. consors* genome, or artefacts due to heterozygosity or misassembly.

On the public BlobToolKit **Viewer** site, all datasets with over 1 million scaffolds are presented with a set of pre-generated images so users not wishing to explore beyond the default visualisations have no need to download or process the data files. In interactive mode, the same threshold is used to filter out scaffolds that lack a taxonomic annotation (those assigned to the “no-hit” category) so the default interactive view emphasises the portion of the dataset that provides most information for contaminant screening (Figure 4C). For this assembly, filtering out “no-hit” scaffolds leaves 43,857 scaffolds (1.6% of all contigs) with a total span of 209 Mb (10.2% of the total span). Below a default threshold of 100,000 scaffolds, it is computationally reasonable to plot individual scaffolds as scaled circles, even on relatively low-powered devices. However, the resulting image can be difficult to interpret as the visibility of specific features becomes dependent on plotting order with the last plotted scaffolds having greatest prominence (Figure 4D).

556 Using a kite representation highlights a distinct distribution of Firmicute scaffolds  
557 in the *C. consors* assembly (Figure 4E) suggesting that these represent a  
558 contaminant.

559

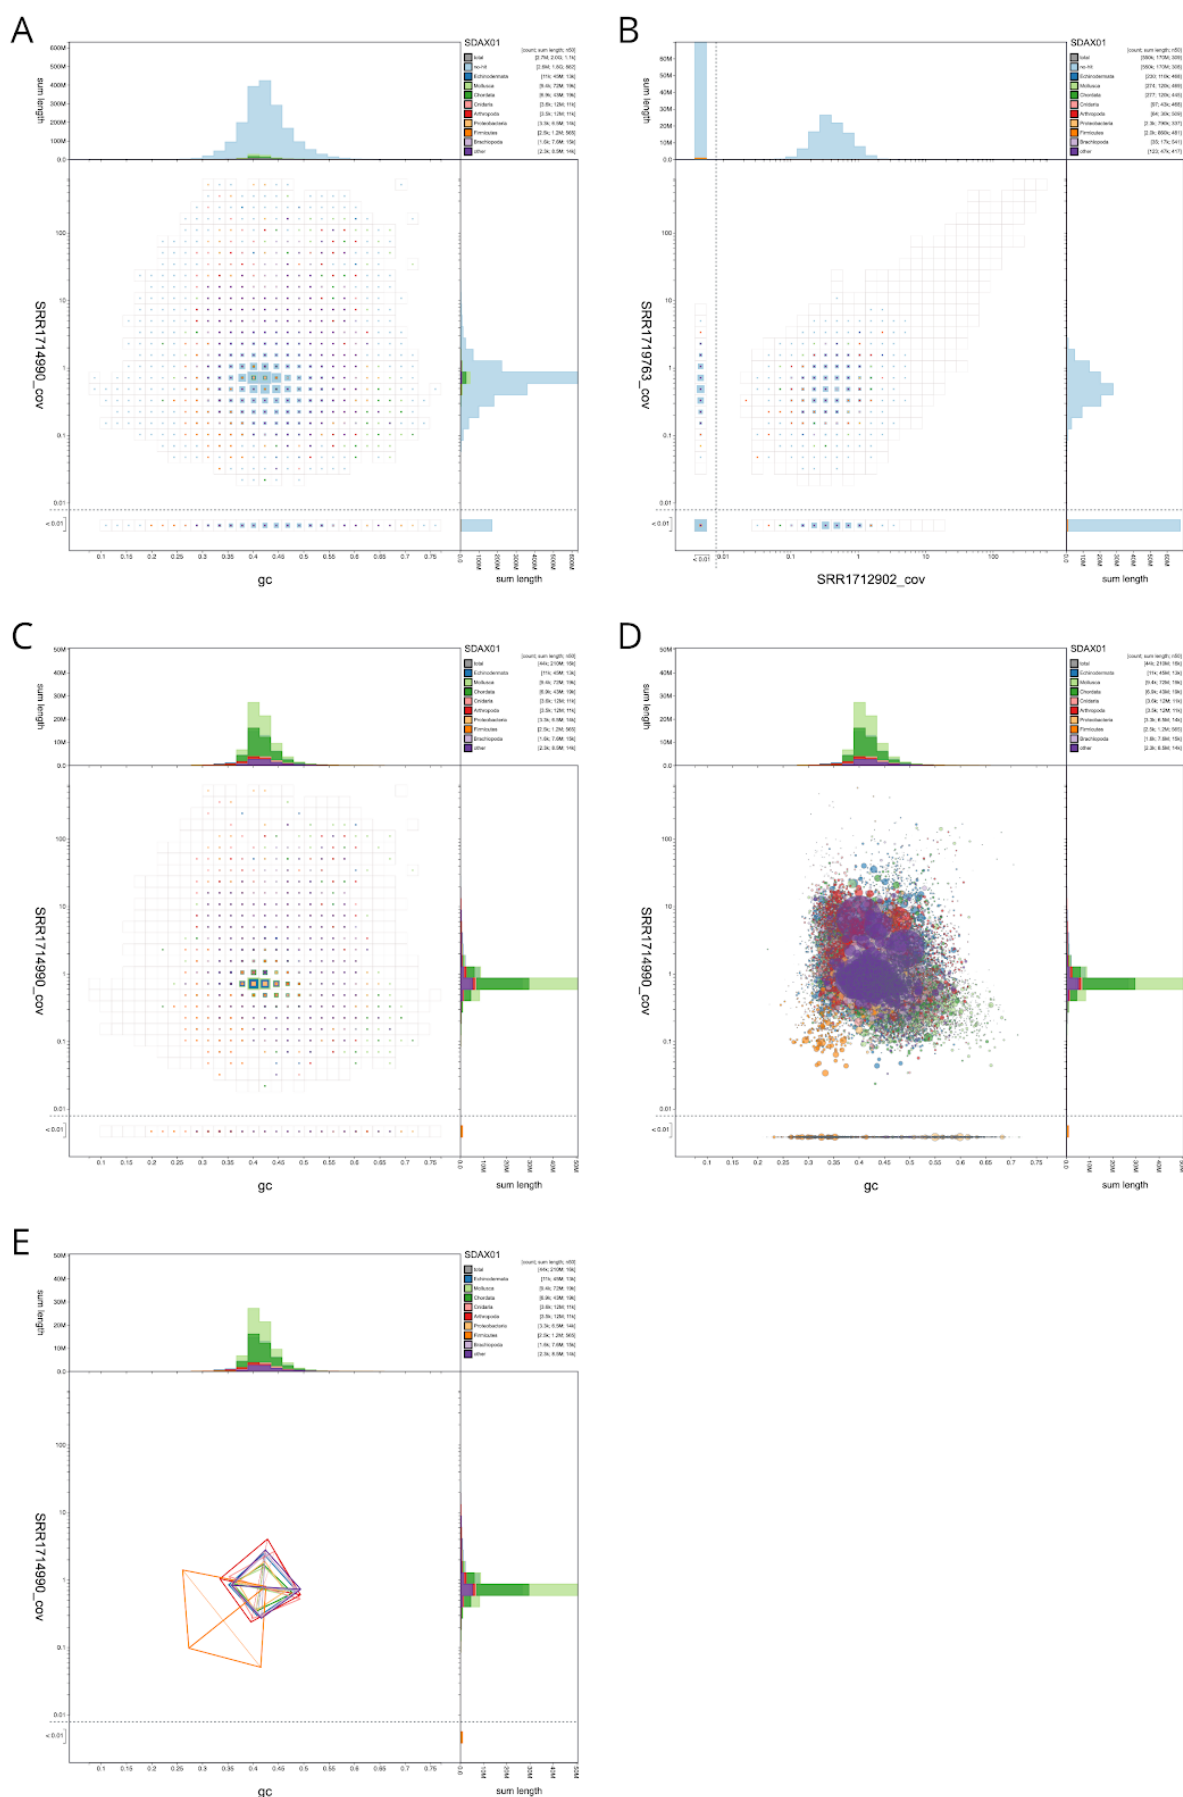

# **Figure 4. Visualisation of the highly fragmented *Conus consors* assembly SDAX01.**

(A) Binned distribution of all 2,688,687 assembly scaffolds shows unimodal distributions in GC proportion and coverage axes. The majority of scaffolds lack a taxonomic annotation (assigned to "no-hit"). (B) Square-binned plot of coverage in read set SRR1719763 against coverage in SRR1712902 for scaffolds with coverage  $\leq 0.01$  in read set SRR1714990. The extent of the unfiltered distribution is indicated by the empty square bins. (C) In the interactive browser datasets with over 1,000,000 scaffolds are presented with the "no-hit" scaffolds filtered out to reduce computation. In this case, 43,857 scaffolds are plotted in the filtered dataset. (D) A non-binned presentation of the same data shows the challenges of interpreting a dataset plotted as a large number of overlapping circles, even after filtering "no-hit". (E) A simplified representation of the distributions of scaffolds assigned to each phylum highlights the difference in GC proportion and coverage of scaffolds assigned to Firmicute. This figure can be regenerated, and explored further, using the URLs given in File S1.

577

## Identification of mis-annotated records in public databases

578 The genomes of many bird species are being generated to understand the  
579 evolution of this important group, and to explore the evolutionary genomics of  
580 particular phenotypes (Jarvis et al. 2014). While most other palaeognath birds  
581 (kiwis, ostriches, rheas and their kin) are flightless, tinamous can fly, and genomic  
582 analyses are exploring the biology of this phenotypic shift (Sackton et al. 2019).  
583 The genome assembly of the thicket tinamou, *Crypturellus cinnamomeus* (PTEZ01;  
584 GCA\_003342915.1) (Sackton et al. 2019) was analysed using BlobToolKit. We noted  
585 that this assembly (total span 1.1 Gb) contained ~130 Mb of scaffolds that had  
586 coverage an order of magnitude lower than that of the main part of the assembly  
587 (Figure 5A). This blob of scaffolds also had a mean GC proportion of 0.52,  
588 contrasting with the main assembly GC proportion of 0.42. Exploring the biology  
589 of this set of scaffolds revealed several interesting features.

590 Half of the span of the low-coverage scaffolds (58 Mb) was assigned to the protist  
591 group Eucoccidiorida, and more specifically had high-scoring matches to  
592 *Sarcocystis* species (Figure 5B). *Sarcocystis* are apicomplexan parasites that infect  
593 a wide range of vertebrate and non-vertebrate hosts. Sarcocystidae, which  
594 includes the important pathogens *Neospora* and *Toxoplasma*, have genomes that  
595 range from ~60 Mb to 127 Mb (*Sarcocystis neurona*). The other scaffolds in the  
596 low-coverage blob either had no annotation (39 Mb) or were annotated as  
597 deriving from a cetacean, *Physeter catodon* (Physeteridae; the sperm whale; 24  
598 Mb) or a galliform bird, *Colinus virginianus* (Odontophoridae; the northern  
599 bobwhite quail; 8 Mb). While it is possible that a bird genomics laboratory might  
600 contaminate across species, the northern bobwhite genome was not sequenced  
601 by the same team that sequenced the tinamou, and contamination with sperm  
602 whale is hard to imagine. Instead, we infer that the bobwhite and sperm whale  
603 genomes are also contaminated by co-assembled genomes from *Sarcocystis*-like  
604 apicomplexans. Available *C. virginianus* and *P. catodon* assemblies were analysed  
605 with BlobToolKit to determine the presence of Apicomplexan-assigned scaffolds  
606 in these assemblies (Table 3). A total of 48 Mb of the 1.2Gb (4%) of the *C. virginianus*  
607 assembly AWGT02 (GCA\_000599465.2 (Oldeschulte et al. 2017)) is inferred to be  
608 derived from an apicomplexan parasite. For *P. catodon*, the only published  
609 assembly, AWZP01 (GCA\_000472045.1 (Warren et al. 2017)) is inferred to be free of  
610 contamination with sequences of apicomplexan origin. However, two more recent  
611 assemblies, including a chromosome-level assembly PGGR02 (GCA\_002837175.2),  
612 which is tagged as the RefSeq (Pruitt, Tatusova, and Maglott 2005) representative  
613 genome, each contain 4.3 Mb of sequence assigned to Apicomplexa.

614 Thus 11% of this genome assembly appears to derive not from the target species  
615 but rather from a parasite, and sequence from this group of parasites is also  
616 present in other genome assemblies from diverse target species. This  
617 contamination of the INSDC databases with whole genomes mistakenly attributed



to their host species identity means that the public commons becomes an untrustworthy substrate for discovery research. Critically, as with the *D. albomicans* example above (Figure 1), the likely *Sarcocystis*-derived scaffolds contained many BUSCO annotations (Figure 5C), and contributed 6% of the unique eukaryote BUSCO hits in the assembly (Table 2).

We have identified additional examples of co-sequencing of apicomplexan pathogens with target species in other taxa (Table 3). These include early assemblies of the model organisms *Mus musculus* and *Rattus norvegicus*, for which subsequent revisions have been released that have shorter span and few or no remaining apicomplexan-assigned sequences. For non-model organisms the resources available for assembly revision are considerably smaller so it is important to have the means to identify co-sequencing with pathogens and other cobionts. BlobToolKit makes evident these fascinating biological juxtapositions, and facilitates evidence-led separation of host from cobiont. Indeed this task was one of the original motivations for the development of the blob plot: to separate symbiont genomes from those of their hosts (Kumar et al. 2013).

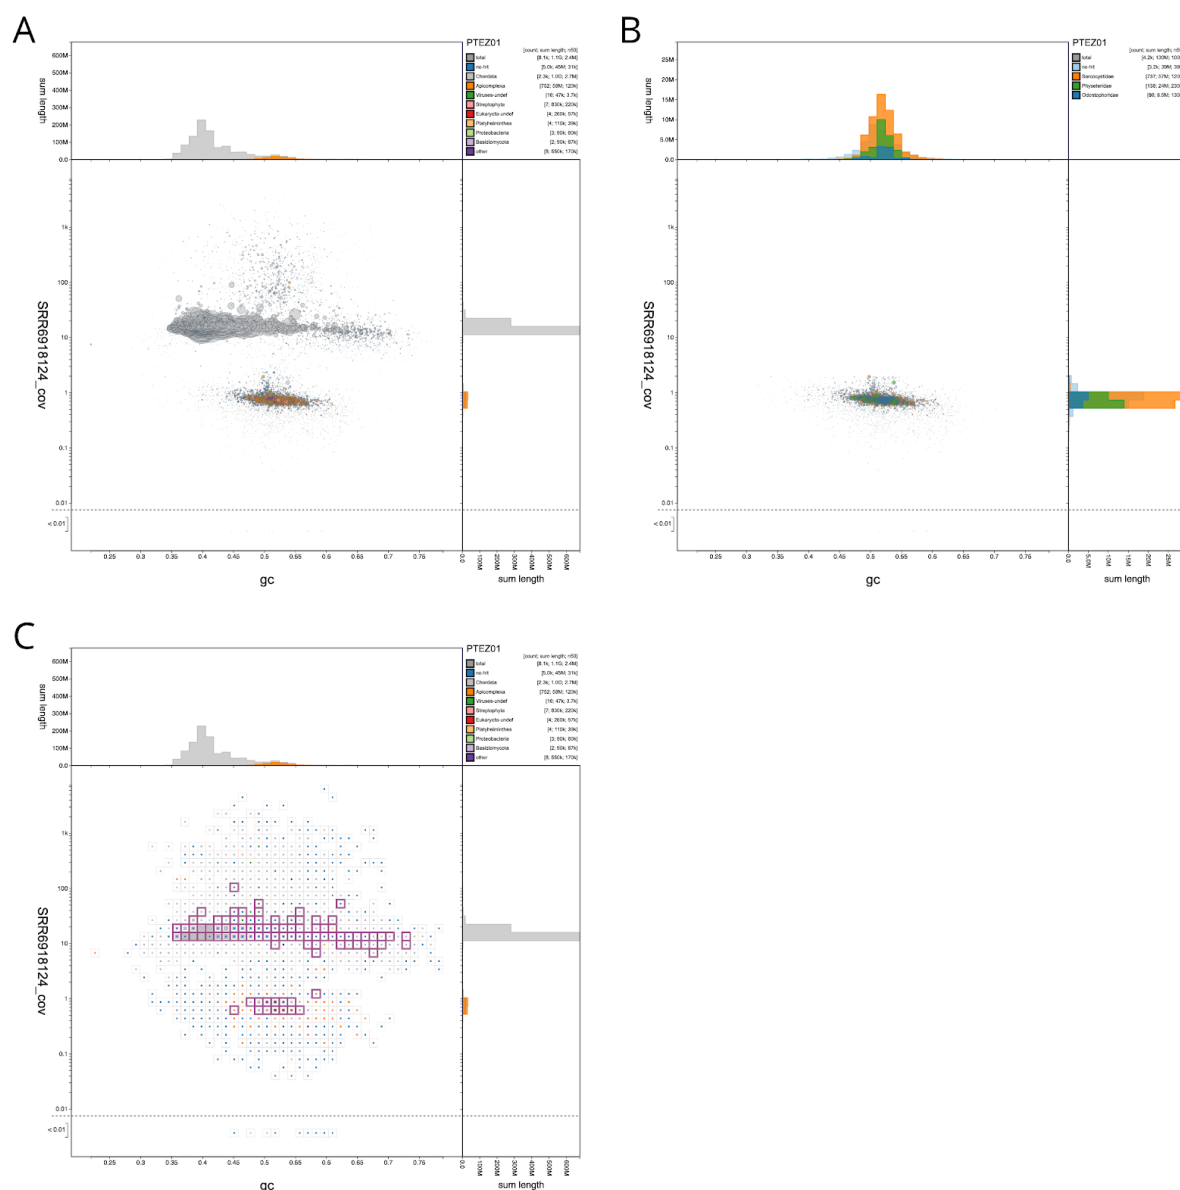

**Figure 5. Blob plots of the *Crypturellus cinnamomeus* assembly PTEZ01 showing the presence of an apicomplexan parasite.**

(A) Circles are scaled with area proportional to scaffold length and coloured by phylum. Scaffolds assigned to the phylum Apicomplexa are coloured orange and form a distinct blob relative to the majority of Chordata-assigned scaffolds, shown in grey. (B) Circles are coloured by family and scaffolds assigned to families other than Physeteridae, Odontophoridae or Sarcocystidae have been filtered out. Scaffolds with coverage greater than 2 in the SRR6918124 read set have also been excluded. (C) A square-binned plot in which bins containing scaffolds with BUSCO annotations using any of the applicable reference gene sets are outlined in pink. The list of selected scaffolds is included in File S2. This figure can be regenerated, and explored further, using the URLs given in File S1.

**Table 2. BUSCO scores\* for the *Crypturellus cinnamomeus* assembly PTEZ01.**

| <i>Lineage</i>         | <i>Complete</i> | <i>Duplicated</i> | <i>Fragmented</i> | <i>Missing</i> | <i>Single copy</i> | <i>Total</i> |
|------------------------|-----------------|-------------------|-------------------|----------------|--------------------|--------------|
| <b>aves_odb9</b>       | 92.8% (-0.1%)   | 1.0% (-0.1%)      | 4.1% (+0.0%)      | 3.1% (+0.1%)   | 91.8% (+0.0%)      | 4915         |
| <b>tetrapoda_odb9</b>  | 96.1% (-0.1%)   | 0.3% (-0.0%)      | 2.3% (+0.0%)      | 1.6% (+0.1%)   | 95.8% (-0.1%)      | 3950         |
| <b>vertebrata_odb9</b> | 97.4% (-0.2%)   | 0.2% (-0.1%)      | 1.4% (-0.0%)      | 1.2% (+0.2%)   | 97.1% (-0.1%)      | 2586         |
| <b>metazoa_odb9</b>    | 91.6% (-3.2%)   | 1.2% (-0.7%)      | 3.5% (-0.5%)      | 4.9% (+3.7%)   | 90.4% (-2.5%)      | 978          |
| <b>eukaryota_odb9</b>  | 91.4% (-8.3%)   | 3.6% (-3.3%)      | 4.3% (-1.7%)      | 4.3% (+9.9%)   | 87.8% (-5.0%)      | 303          |

\* BUSCO analyses were performed using BUSCO 3.0.2 and the indicated orthologue group sets. Numbers in parentheses show the change in score when scaffolds with a coverage below 2 in read set SRR6g18124 are removed from the assembly. Values were obtained from the public **Viewer** instance using the URLs given in File S1.

**Table 3. Presence of Apicomplexa-assigned sequences in selected chordate genome assemblies\*.**

| <i>Species</i>                   | <i>Accession</i>   |                 | <i>Date</i>       | <i>Span (Mb)</i>   |                 |              |
|----------------------------------|--------------------|-----------------|-------------------|--------------------|-----------------|--------------|
|                                  | <i>BlobToolKit</i> | <i>GCA</i>      |                   | <i>Apicomplexa</i> | <i>Chordata</i> | <i>Total</i> |
| <i>Colinus virginianus</i>       | AWGT02             | GCA_000599465.2 | 2017 <sup>a</sup> | 48.0               | 1074            | 1254         |
| <i>Crypturellus cinnamomeus</i>  | PTEZ01             | GCA_003342915.1 | 2018 <sup>b</sup> | 59.9               | 1017            | 1122         |
| <i>Mus musculus</i>              | AAHY01             | GCA_000002165.1 | 2009 <sup>c</sup> | 188.9              | 2738            | 3251         |
| <i>Mus musculus</i>              | LXEJ02             | GCA_003774525.2 | 2018 <sup>d</sup> | 0.0                | 2687            | 2801         |
| <i>Physeter catodon</i>          | AWZP01             | GCA_000472045.1 | 2013 <sup>e</sup> | 0.0                | 2279            | 2280         |
| <i>Physeter catodon</i>          | UEMC01             | GCA_900411695.1 | 2018 <sup>f</sup> | 4.3                | 2472            | 2512         |
| <i>Physeter catodon</i>          | PGGR02             | GCA_002837175.2 | 2019 <sup>g</sup> | 4.3                | 2472            | 2512         |
| <i>Piliocolobus tephrosceles</i> | PDMG02             | GCA_002776525.2 | 2018 <sup>h</sup> | 33.3               | 2976            | 3038         |
| <i>Rattus norvegicus</i>         | AAHX01             | GCA_000002265.1 | 2006 <sup>i</sup> | 15.4               | 2699            | 2932         |
| <i>Rattus norvegicus</i>         | AABR07             | GCA_000001895.4 | 2014 <sup>j</sup> | 0.2                | 2869            | 2870         |

\* The data for this table can be obtained using the URL given in File S1

<sup>a</sup> (Oldeschulte et al. 2017)

<sup>b</sup> (Sackton et al. 2019)

<sup>c</sup> (Mural et al. 2002)

<sup>d</sup> Most recent non-chromosomal assembly (see

[https://www.ncbi.nlm.nih.gov/assembly/GCA\\_003774525.2](https://www.ncbi.nlm.nih.gov/assembly/GCA_003774525.2))

<sup>e</sup> (Warren et al. 2017)

<sup>f</sup> (see [https://www.ncbi.nlm.nih.gov/assembly/GCA\\_900411695.1](https://www.ncbi.nlm.nih.gov/assembly/GCA_900411695.1))

<sup>g</sup> (see [https://www.ncbi.nlm.nih.gov/assembly/GCA\\_000472045.1](https://www.ncbi.nlm.nih.gov/assembly/GCA_000472045.1))

<sup>h</sup> (see [https://www.ncbi.nlm.nih.gov/assembly/GCA\\_000472045.1](https://www.ncbi.nlm.nih.gov/assembly/GCA_000472045.1))

<sup>i</sup> (Florea et al. 2005)

<sup>j</sup> (Gibbs et al. 2004)

674

# Discussion

675 BlobToolKit is a significant extension of the approach launched in BlobTools. In  
 676 particular, by permitting user interaction with the rich data associated with each  
 677 contig in the **Viewer** mode, BlobToolKit can enhance discovery of novel biology.  
 678 The addition of real-time interaction addresses a criticism of the approach,  
 679 relative to cluster-based methods such as Anvi'o (Eren et al. 2015), that it limits the  
 680 amount of supporting data that can be included (Delmont and Eren 2016). We  
 681 envisage three main uses for BlobToolKit. The first is in the research laboratory  
 682 aiming to sequence for the first time the genome of a new species. BlobToolKit  
 683 can be used during the assembly process, to filter contaminants and cobionts,  
 684 and to explore issues such as haploid *versus* diploid contigs, and patterns of  
 685 coverage in different sequence read datasets (for example, comparing male and  
 686 female read sets in heterogametic organisms). As part of an assembly workflow,  
 687 BlobToolKit should ensure better quality assemblies with higher biological  
 688 credibility.

689 The second use is in publication and visualisation of published assemblies. The  
 690 BlobToolKit **Viewer** generates publication quality images that are fully  
 691 reproducible via the embedding of control parameters in the URL. These images  
 692 should, we believe, become standard in reporting genome assemblies, and thus  
 693 enhance the ease of assessment of assembly quality. We have worked to embed  
 694 BlobToolKit views into the presentation of genome assemblies at the ENA for just  
 695 this reason and believe that we have demonstrated that collaboration between  
 696 tools developers and public databases is important in refining best practice in  
 697 data publication. Journals may generate (or request that authors supply)  
 698 BlobToolKit assessments of new assemblies submitted for publication, to aid  
 699 review and speed publication of high quality data.

700 The third is in comparative and evolutionary genomics. With ongoing  
 701 improvements in sequencing technologies and assembly software, genome  
 702 assemblies are improving in quality and contiguity. Amongst other players, the  
 703 Earth Biogenome Project (Lewin et al. 2018), 10K Vertebrate Genome Project  
 704 (Genome 10K Community of Scientists 2009) and Tree of Life project  
 705 (<https://www.sanger.ac.uk/science/programmes/tree-of-life>) collectively aim to  
 706 generate chromosomally-contiguous reference genomes for (in the first instance)  
 707 all known families of Eukaryota. BlobToolKit protocols can be used to explore  
 708 these genomes for evidence of past horizontal gene transfer, for the presence of  
 709 symbionts and parasites, and to explore chromosomal patterns of gene  
 710 expression.

711 The difficulty we experienced in associating raw sequence read sets with  
 712 submitted assemblies has led ENA to include a more apparent and thorough  
 713 explanation of the benefits of and process for referencing reads during eukaryotic

genome assembly submission to the repository. We advocate the practice of assembly submission along with associated reads to INSDC to enable downstream analysis and assembly contamination detection.

We aim to complete analysis of all public genomes in INSDC and post them to the BlobToolKit **Viewer** website at <https://blobtoolkit.genomehubs.org/view> in the near future, and then maintain currency with the flow of new genomes. The toolkit is under active development (see <https://github.com/blobtoolkit>) and we welcome feature requests and collaborations to expand and improve its capabilities.



# Data Availability

All code is available on Github and release versions have been deposited in the Zenodo open access repository:

## **BlobTools2** v2.1:

<https://github.com/blobtoolkit/blobtools2>

<https://doi.org/10.5281/zenodo.3531583>

## **INSDC-pipeline** v1.0:

<https://github.com/blobtoolkit/insdc-pipeline>

<https://doi.org/10.5281/zenodo.3533168>

## **Specification** v1.0:

<https://github.com/blobtoolkit/specification>

<https://doi.org/10.5281/zenodo.3531846>

## **Viewer** v1.0:

<https://github.com/blobtoolkit/viewer>

<https://doi.org/10.5281/zenodo.3533128>

All processed datasets referred to in this manuscript can be viewed interactively on the public instance of the **Viewer** at <https://blobtoolkit.genomehubs.org/view>, accessed programmatically through the **Viewer** API (see <https://blobtoolkit.genomehubs.org/api-docs/>) or downloaded from <https://blobtoolkit.genomehubs.org/download>.

Supplementary Files S1-S3 have been deposited in Figshare.

745

# Acknowledgements

746 BlobToolKit is based on Blobology by Sujai Kumar and BlobTools by Dominik  
 747 Laetsch and we thank both, and other colleagues in the Blaxter lab, for their  
 748 comments and criticisms. This work was funded by a BBSRC Bioinformatics and  
 749 Biological Resources award BB/P024238/1.

750

751

# References

- 752 Altschul, S. 1997. "Gapped BLAST and PSI-BLAST: A New Generation of Protein  
753 Database Search Programs." *Nucleic Acids Research*.  
754 <https://doi.org/10.1093/nar/25.17.3389>.
- 755 Amid, Clara, Blaise T. F. Alako, Vishnukumar Balavenkataraman Kadhivelu, Tony  
756 Burdett, Josephine Burgin, Jun Fan, Peter W. Harrison, et al. 2019. "The  
757 European Nucleotide Archive in 2019." *Nucleic Acids Research*, November.  
758 <https://doi.org/10.1093/nar/gkz1063>.
- 759 Andreson, Reidar, Märt Roosaare, Lauris Kaplinski, Silja Laht, Triinu Kõressaar,  
760 Maarja Lepamets, Age Brauer, Viktorija Kukuškina, and Mado Remm. 2019.  
761 "Gene Content of the Fish-Hunting Cone Snail *Conus* Consors." *bioRxiv*.  
762 <https://doi.org/10.1101/590695>.
- 763 Arakawa, Kazuharu. 2016. "No Evidence for Extensive Horizontal Gene Transfer  
764 from the Draft Genome of a Tardigrade." *Proceedings of the National Academy  
765 of Sciences of the United States of America*.
- 766 Artamonova, Irena I., Tanya Lappi, Liudmila Zudina, and Arcady R. Mushegian.  
767 2015. "Prokaryotic Genes in Eukaryotic Genome Sequences: When to Infer  
768 Horizontal Gene Transfer and When to Suspect an Actual Microbe."  
769 *Environmental Microbiology* 17 (7): 2203–8.
- 770 Buchfink, B., C. Xie, and D. H. Huson. 2015. "Fast and Sensitive Protein Alignment  
771 Using DIAMOND." *Nature Methods* 12 (1): 59–60.
- 772 Challis, Richard J., Sujai Kumar, Kanchon Dasmahapatra, Chris D. Jiggins, and Mark  
773 Blaxter. 2016. "Lepbase: The Lepidopteran Genome Database."  
774 <https://doi.org/10.1101/056994>.
- 775 Crotti, Elena, Aurora Rizzi, Bessem Chouaia, Irene Ricci, Guido Favia, Alberto Alma,  
776 Luciano Sacchi, et al. 2010. "Acetic Acid Bacteria, Newly Emerging Symbionts  
777 of Insects." *Applied and Environmental Microbiology* 76 (21): 6963–70.
- 778 Delmont, Tom O., and A. Murat Eren. 2016. "Identifying Contamination with  
779 Advanced Visualization and Analysis Practices: Metagenomic Approaches for  
780 Eukaryotic Genome Assemblies." *PeerJ* 4 (March): e1839.
- 781 Dunning-Hotopp, J. C., M. E. Clark, D. C. Oliveira, J. M. Foster, P. Fischer, M. C.  
782 Munoz Torres, J. D. Giebel, et al. 2007. "Widespread Lateral Gene Transfer from  
783 Intracellular Bacteria to Multicellular Eukaryotes." *Science* 317 (5845): 1753–56.
- 784 Ekblom, Robert, and Jochen B. W. Wolf. 2014. "A Field Guide to Whole-Genome  
785 Sequencing, Assembly and Annotation." *Evolutionary Applications* 7 (9):  
786 1026–42.
- 787 Eren, A. Murat, Özcan C. Esen, Christopher Quince, Joseph H. Vineis, Hilary G.  
788 Morrison, Mitchell L. Sogin, and Tom O. Delmont. 2015. "Anvi'o: An Advanced  
789 Analysis and Visualization Platform for 'Omics Data." *PeerJ* 3 (October): e1319.
- 790 Florea, Liliana, Valentina Di Francesco, Jason Miller, Russell Turner, Alison Yao,  
791 Michael Harris, Brian Walenz, et al. 2005. "Gene and Alternative Splicing  
792 Annotation with AIR." *Genome Research* 15 (1): 54–66.
- 793 Genome 10K Community of Scientists. 2009. "Genome 10K: A Proposal to Obtain  
794 Whole-Genome Sequence for 10,000 Vertebrate Species." *The Journal of  
795 Heredity* 100 (6): 659–74.
- 796 Gibbs, Richard A., George M. Weinstock, Michael L. Metzker, Donna M. Muzny,  
797 Erica J. Sodergren, Steven Scherer, Graham Scott, et al. 2004. "Genome  
798 Sequence of the Brown Norway Rat Yields Insights into Mammalian Evolution."

- 799 *Nature* 428 (6982): 493–521.
- 800 Jarvis, Erich D., Siavash Mirarab, Andre J. Aberer, Bo Li, Peter Houde, Cai Li, Simon
- 801 Y. W. Ho, et al. 2014. "Whole-Genome Analyses Resolve Early Branches in the
- 802 Tree of Life of Modern Birds." *Science* 346 (6215): 1320–31.
- 803 Köster, Johannes, and Sven Rahmann. 2018. "Snakemake-a Scalable
- 804 Bioinformatics Workflow Engine." *Bioinformatics* 34 (20): 3600.
- 805 Kumar, Sujai, and Mark L. Blaxter. 2011. "Simultaneous Genome Sequencing of
- 806 Symbionts and Their Hosts." *Symbiosis* 55 (3): 119–26.
- 807 Kumar, Sujai, Martin Jones, Georgios Koutsovoulos, Michael Clarke, and Mark
- 808 Blaxter. 2013. "Blobology: Exploring Raw Genome Data for Contaminants,
- 809 Symbionts and Parasites Using Taxon-Annotated GC-Coverage Plots."
- 810 *Frontiers in Genetics* 4: 237.
- 811 Laetsch, Dominik R., and Mark L. Blaxter. 2017. "BlobTools: Interrogation of Genome
- 812 Assemblies." *F1000Research*. <https://doi.org/10.12688/f1000research.12232.1>.
- 813 Lewin, Harris A., Gene E. Robinson, W. John Kress, William J. Baker, Jonathan
- 814 Coddington, Keith A. Crandall, Richard Durbin, et al. 2018. "Earth BioGenome
- 815 Project: Sequencing Life for the Future of Life." *Proceedings of the National*
- 816 *Academy of Sciences of the United States of America* 115 (17): 4325–33.
- 817 López-García, Purificación, Laura Eme, and David Moreira. 2017. "Symbiosis in
- 818 Eukaryotic Evolution." *Journal of Theoretical Biology* 434 (December): 20–33.
- 819 Merchant, Samier, Derrick E. Wood, and Steven L. Salzberg. 2014. "Unexpected
- 820 Cross-Species Contamination in Genome Sequencing Projects." *PeerJ* 2
- 821 (November): e675.
- 822 Mural, Richard J., Mark D. Adams, Eugene W. Myers, Hamilton O. Smith, George L.
- 823 Gabor Miklos, Ron Wides, Aaron Halpern, et al. 2002. "A Comparison of
- 824 Whole-Genome Shotgun-Derived Mouse Chromosome 16 and the Human
- 825 Genome." *Science* 296 (5573): 1661–71.
- 826 Oldeschulte, David L., Yvette A. Halley, Miranda L. Wilson, Eric K. Bhattarai, Wesley
- 827 Brashear, Joshua Hill, Richard P. Metz, et al. 2017. "Annotated Draft Genome
- 828 Assemblies for the Northern Bobwhite () and the Scaled Quail () Reveal
- 829 Disparate Estimates of Modern Genome Diversity and Historic Effective
- 830 Population Size." *G3* 7 (9): 3047–58.
- 831 Pruitt, Kim D., Tatiana Tatusova, and Donna R. Maglott. 2005. "NCBI Reference
- 832 Sequence (RefSeq): A Curated Non-Redundant Sequence Database of
- 833 Genomes, Transcripts and Proteins." *Nucleic Acids Research* 33 (Database
- 834 issue): D501–4.
- 835 Sackton, Timothy B., Phil Grayson, Alison Cloutier, Zhirui Hu, Jun S. Liu, Nicole E.
- 836 Wheeler, Paul P. Gardner, et al. 2019. "Convergent Regulatory Evolution and
- 837 Loss of Flight in Paleognathous Birds." *Science* 364 (6435): 74–78.
- 838 Salter, Susannah J., Michael J. Cox, Elena M. Turek, Szymon T. Calus, William O.
- 839 Cookson, Miriam F. Moffatt, Paul Turner, Julian Parkhill, Nicholas J. Loman, and
- 840 Alan W. Walker. 2014. "Reagent and Laboratory Contamination Can Critically
- 841 Impact Sequence-Based Microbiome Analyses." *BMC Biology* 12 (November):
- 842 87.
- 843 Salzberg, Steven L., Julie C. Dunning Hotopp, Arthur L. Delcher, Mihai Pop,
- 844 Douglas R. Smith, Michael B. Eisen, and William C. Nelson. 2005.
- 845 "Serendipitous Discovery of Wolbachia Genomes in Multiple Drosophila
- 846 Species." *Genome Biology* 6 (3): R23.
- 847 Warren, Wesley C., Lukas Kuderna, Alana Alexander, Julian Catchen, José G.
- 848 Pérez-Silva, Carlos López-Otín, Víctor Quesada, et al. 2017. "The Novel
- 849 Evolution of the Sperm Whale Genome." *Genome Biology and Evolution* 9 (12):

3260–64.  
 Waterhouse, Robert M., Mathieu Seppey, Felipe A. Simão, Mosè Manni, Panagiotis Ioannidis, Guennadi Klioutchnikov, Evgenia V. Kriventseva, and Evgeny M. Zdobnov. 2017. "BUSCO Applications from Quality Assessments to Gene Prediction and Phylogenomics." *Molecular Biology and Evolution*, December. <https://doi.org/10.1093/molbev/msx319>.  
 Werren, J. H., L. Baldo, and M. E. Clark. 2008. "Wolbachia: Master Manipulators of Invertebrate Biology." *Nature Reviews. Microbiology* 6 (10): 741–51.  
 Zhou, Qi, Hong-Mei Zhu, Quan-Fei Huang, Li Zhao, Guo-Jie Zhang, Scott W. Roy, Beatriz Vicoso, et al. 2012. "Deciphering Neo-Sex and B Chromosome Evolution by the Draft Genome of *Drosophila Albomicans*." *BMC Genomics* 13 (March): 109.
